# Supplementary material
Source: Research Square preprint supplement (doi:10.21203/rs.3.rs-9586853/v1)
Supplement: Supplementary file 1 [file 83301c3fde7e1b50a436611a.docx]

**Supplementary Materials**

The following supplementary materials are available online:

Supplementary Table S1. Complete GSEA pathway enrichment results.

Supplementary Table S2. Kaplan-Meier survival estimates by CEACAM6 expression group.

Supplementary Figure S1. Log-log survival plots for proportional hazards assumption checking.

Supplementary Figure S2. CEACAM6 expression distribution histograms by survival status.

Supplementary Figure S3. External validation of CEACAM6 overexpression (GSE53625).
